## 1 **Integration of machine learning and pan-genomics expands the biosynthetic landscape of RiPP** 2 **natural products**

3 Alexander M. Kloosterman<sup>1</sup>, Peter Cimermancic<sup>2</sup>, Somayah S. Elsayed<sup>1</sup>, Chao Du<sup>1</sup>, Michalis  
4 Hadjithomas<sup>3§</sup>, Mohamed S. Donia<sup>5</sup>, Michael A. Fischbach<sup>4</sup>, Gilles P. van Wezel<sup>1#</sup>, and Marnix H.  
5 Medema<sup>6#</sup>.

6 1. Institute of Biology, Leiden University, Netherlands. 2. Verily Life Sciences, South San Francisco, CA.  
7 3. DOE Joint Genome Institute, Walnut Creek, CA. 4. Department of Bioengineering, Stanford  
8 University, CA. 5. Department of Molecular Biology, Princeton University, NJ. 6. Bioinformatics group,  
9 Wageningen University, Netherlands

10 # Corresponding authors: [g.wezel@biology.leidenuniv.nl](mailto:g.wezel@biology.leidenuniv.nl), [marnix.medema@wur.nl](mailto:marnix.medema@wur.nl)

11 § Current address: LifeMine Therapeutics, Cambridge, MA

## 12 **Abstract**

13 Most clinical drugs are based on microbial natural products, with compound classes including  
14 polyketides (PKS), non-ribosomal peptides (NRPS), fluoroquinones and ribosomally synthesized and  
15 post-translationally modified peptides (RiPPs). While variants of biosynthetic gene clusters (BGCs) for  
16 known classes of natural products are easy to identify in genome sequences, BGCs for new  
17 compound classes escape attention. In particular, evidence is accumulating that for RiPPs, subclasses  
18 known thus far may only represent the tip of an iceberg. Here, we present decRiPPter (Data-driven  
19 Exploratory Class-independent RiPP TrackER), a RiPP genome mining algorithm aimed at the  
20 discovery of novel RiPP classes. DecRiPPter combines a Support Vector Machine (SVM) that identifies  
21 candidate RiPP precursors with pan-genomic analyses to identify which of these are encoded within  
22 operon-like structures that are part of the accessory genome of a genus. Subsequently, it prioritizes  
23 such regions based on the presence of new enzymology and based on patterns of gene cluster and  
24 precursor peptide conservation across species. We then applied decRiPPter to mine 1,295  
25 *Streptomyces* genomes, which led to the identification of 42 new candidate RiPP families that could  
26 not be found by existing programs. One of these was studied further and elucidated as a novel  
27 subfamily of lanthipeptides, designated Class V. Two previously unidentified modifying enzymes are  
28 proposed to create the hallmark lanthionine bridges. Taken together, our work highlights how novel  
29 natural product families can be discovered by methods going beyond sequence similarity searches to  
30 integrate multiple pathway discovery criteria.

31

## 32 **Code and data availability**

33 The source code of DecRiPPter is freely available online at <https://github.com/Alexamk/decRiPPter>.  
34 Results of the data analysis are available online at  
35 [http://www.bioinformatics.nl/~medem005/decRiPPter\\_strict/index.html](http://www.bioinformatics.nl/~medem005/decRiPPter_strict/index.html) and  
36 [http://www.bioinformatics.nl/~medem005/decRiPPter\\_mild/index.html](http://www.bioinformatics.nl/~medem005/decRiPPter_mild/index.html) (for the strict and mild  
37 filters, respectively). All training data and code used to generate these, as well as outputs of the data  
38 analyses, are available on Zenodo at [doi:10.5281/zenodo.3834818](https://doi.org/10.5281/zenodo.3834818).

39

## 40 Introduction

41 The introduction of antibiotics in the 20<sup>th</sup> century contributed hugely to extend the human life span.  
42 However, the increase in antibiotic resistance and the concomitant steep decline in the number of  
43 new compounds discovered via high-throughput screening<sup>1,2</sup>, means that we again face huge  
44 challenges to treat infections by multi-drug resistant bacteria<sup>3</sup>. The low return of investment of high  
45 throughput screening is due to dereplication, in other words, the rediscovery of bioactive  
46 compounds that have been identified before<sup>4,5</sup>. A revolution in our understanding was brought about  
47 by the development of next-generation sequencing technologies. Actinobacteria are the most prolific  
48 producers of bioactive compounds, including some two-thirds of the clinical antibiotics<sup>6,7</sup>. Mining of  
49 the genome sequences of these bacteria revealed a huge repository of previously unseen  
50 biosynthetic gene clusters (BGCs), highlighting that their potential as producers of bioactive  
51 molecules had been grossly underestimated<sup>6,8,9</sup>. However, these BGCs are often not expressed under  
52 laboratory conditions, most likely because the environmental cues that activate their expression in  
53 their original habitat are missing<sup>10,11</sup>. To circumvent these issues, a common strategy is to select a  
54 candidate BGC and force its expression by expression of the pathway-specific activator or via  
55 expression of the BGC in a heterologous host<sup>12</sup>. However, these methods are time-consuming, while  
56 it is hard to predict the novelty and utility of the compounds they produce.

57 To improve the success of genome mining-based drug discovery, many bioinformatic tools have been  
58 developed for identification and prioritization of BGCs. These tools often rely on conserved genetic  
59 markers present in BGCs of certain natural products, such as polyketides (PKS), non-ribosomal  
60 peptide synthetases (NRPS) and terpenes<sup>13-15</sup>. While these methods have unearthed vast amounts of  
61 uncharacterized BGCs, they further expand on previously characterized classes of natural products.  
62 This raises the question of whether entirely novel classes of natural products could still be  
63 discovered. A few genome mining methods, such as ClusterFinder<sup>16</sup> and EvoMining<sup>17,18</sup>, have tried to  
64 tackle this problem. These methods either use criteria true of all BGCs or build around the  
65 evolutionary properties of gene families found in BGCs, rather than using specific BGC-class-specific  
66 genetic markers. While the lack of clear genetic markers may result in a higher number of false  
67 positives, these methods have indeed charted previously uncovered biochemical space and led to the  
68 discovery of new natural products.

69 One class of natural products whose expansion has been fueled by the increased amount of genomic  
70 sequences available is that of the ribosomally synthesized and post-translationally modified peptides  
71 (RiPPs)<sup>19</sup>. RiPPs are characterized by a unifying biosynthetic theme: a small gene encodes a short  
72 precursor peptide, which is extensively modified by a series of enzymes that typically recognize the  
73 N-terminal part of the precursor called the leader peptide, and finally cleaved to yield the mature  
74 product<sup>20</sup>. Despite this common biosynthetic logic, RiPP modifications are highly diverse. The latest  
75 comprehensive review categorizes RiPPs into roughly 20 different classes<sup>19</sup>, such as lanthipeptides,  
76 lasso peptides and thiopeptides. Each of these classes is characterized by one or more specific  
77 modifications, such as the thioether bridge in lanthipeptides or the knot-like structure of lasso  
78 peptides. Despite the extensive list of known classes and modifications, new RiPP classes are still  
79 being found. Newly identified RiPP classes often carry unusual modifications, such as D-amino acids<sup>21</sup>,  
80 addition of unnatural amino acids<sup>22,23</sup>,  $\beta$ -amino acids<sup>24</sup>, or new variants of thioether crosslinks<sup>25,26</sup>.  
81 These discoveries strongly indicate that the RiPP genomic landscape remains far from completely  
82 charted, and that novel types of RiPPs with new and unique biological activities may yet be

83 uncovered. However, RiPPs pose a unique and major challenge to genome-based pathway  
84 identification attempts: unlike in the case of NRPSs and PKSs, there are no universally conserved  
85 enzyme families or enzymatic domains that are found across all RiPP pathways. Rather, each class of  
86 RiPPs comprises its own unique set of enzyme families to post-translationally modify the precursor  
87 peptides belonging to that class. Hence, while biosynthetic gene clusters (BGCs) for known RiPP  
88 classes can be identified using conventional genome mining algorithms, a much more elaborate  
89 strategy is required to automate the identification of novel RiPP classes.

90 Several methods have made progress in tackling this challenge. ‘Bait-based’ approaches such as  
91 RODEO<sup>27,28</sup> and RiPPER<sup>29</sup> identify RiPP BGCs by looking for homologues of RiPP tailoring enzymes  
92 (RTEs) of interest, and facilitate identifying these RTEs in novel contexts to find many new RiPP BGCs.  
93 However, these methods still require a known query RTE from a known RiPP subclass. Another tool  
94 recently described, NeuRiPP, is capable of predicting precursors independent of RiPP subclass, but is  
95 limited to precursor analysis<sup>30</sup>. Yet another tool, DeepRiPP, can detect novel RiPP BGCs that are  
96 chemically far removed from known examples, but is mainly designed to identify new members of  
97 known classes<sup>31</sup>. In the end, an algorithm for the discovery of BGCs encoding novel RiPP classes will  
98 need to integrate various sources of information to reliably identify genomic regions that are likely to  
99 encode RiPP precursors along with previously undiscovered RTEs.

100 Here, we present decRiPPter (Data-driven Exploratory Class-independent RiPP TrackER), an  
101 integrative algorithm for the discovery of novel classes of RiPPs, without requiring prior knowledge of  
102 their specific modifications or core enzymatic machinery. DecRiPPter employs a Support Vector  
103 Machine (SVM) classifier that predicts RiPP precursors regardless of RiPP subclass, and combines this  
104 with pan-genomic analysis to identify which putative precursor genes are located within specialized  
105 genomic regions that encode multiple enzymes and are part of the accessory genome of a genus.  
106 Sequence similarity networking of the resulting precursors and gene clusters then facilitates further  
107 prioritization. Applying this method to the gifted natural product producer genus *Streptomyces*, we  
108 identified 42 new RiPP family candidates. Experimental characterization of a widely distributed  
109 candidate RiPP BGC led to the discovery of a novel lanthipeptide that was produced by a previously  
110 unknown enzymatic machinery.

## 111 Results

### 112 RiPP BGC discovery by detection of genomic islands with characteristics typical of RiPP BGCs

113 Given the promise of RiPPs as a source for novel natural products, we set out to construct a platform  
114 to facilitate identification of novel RiPP classes. Since no criteria could be used that are specific for  
115 individual RiPP classes, we used three criteria that generally apply to RiPP BGCs: 1) they contain one  
116 or more ORFs for a precursor peptide; 2) they contain genes encoding modifying machinery in an  
117 operon-like gene cluster together with precursor gene(s); 3) they have a sparse distribution within  
118 the wider taxonomic group in which they are found. To focus on novel RiPP classes, we added a  
119 fourth criterion: 4) they have no direct similarity to BGCs of known classes (Figure 1).

120 For the first criterion, we trained an SVM classifier to distinguish between RiPP precursors and other  
121 peptides. A collection of 175 known RiPP precursors, gathered from RiPP clusters from the MIBiG  
122 repository<sup>32</sup> was used as a positive training set. For the negative training set, we generated a set of  
123 20,000 short non-precursor sequences, consisting of 10,000 randomly selected short proteins (<175  
124 amino acids long) from Uniprot without measurable similarity to RiPP precursors (representative of  
125 gene encoding proteins but not RiPP precursors), and 10,000 translated intergenic sequences  
126 between a stop codon and the next start codon of sizes 30-300 nt taken from 10 genomes across the  
127 bacterial tree of life (representative of spurious ORFs that do not encode proteins). From both  
128 positive and negative training set sequences, 36 different features were extracted describing the  
129 amino acid composition and physicochemical properties of the protein/peptide sequences, as well as  
130 localized enrichment of amino acids prone to modification by RTEs. Based on these, a support vector  
131 machine was trained (see details in Methods section). To make sure that this classifier could predict  
132 precursors independent of RiPP subclass, we trained it on all possible subsets of the positive training  
133 set in which one of the RiPP subclasses was entirely left out (a strategy we termed leave-one-class-  
134 out cross-validation). Typically, the classifier was still capable of predicting the class that was left out,  
135 with an area-under-receiver operating characteristics curve of 0.955.

136 For the second criterion, we made use of the fact that the majority of RiPP BGCs appear to contain  
137 the genes encoding the precursor and the core biosynthetic enzymes in the same strand orientation  
138 within close intergenic distance (81.6% of MIBiG RiPPs). Therefore, candidate gene clusters are  
139 formed from the genes that appear to reside in an operon with predicted precursor genes, based on  
140 intergenic distance and the COG scores calculated (see description of third criterion below, the  
141 Methods section and Figure S1). These gene clusters are then analyzed for protein domains that  
142 could constitute the modifying machinery (Figure 1b). Rather than restricting ourselves to specific  
143 protein domains, we constructed a broad dataset of Pfam and TIGRFAM domains that are linked to  
144 an E.C. number using InterPro mappings<sup>33</sup>. This dataset was extended with a previously curated set of  
145 Pfam domains found to be prevalent in the positive training set of the ClusterFinder algorithm<sup>34</sup>, and  
146 manually curated, resulting in a set of 4,131 protein domains. We also constructed Pfam<sup>35</sup> and  
147 TIGRFAM<sup>36</sup> domain datasets of transporters, regulators and peptidases, as well as a dataset  
148 consisting of known RiPP modifying domains to provide more detailed annotation and allow specific  
149 filtering of RiPP BGCs based on the presence of each of these types of Pfam domains (Supplemental  
150 Document 2).

151 For the third criterion, we sought to distinguish specialized genomic regions from conserved genomic  
152 regions. Indeed, most BGCs are sparingly distributed among genomes, with even closely related

153 strains showing differences in their BGC repertoires<sup>37–39</sup>. We therefore developed an algorithm that  
154 separates the ‘core’ genome from the ‘accessory’ genome, by comparing all genes in a group of  
155 query genomes from the same taxon (typically a genus), and identifying the frequency of occurrence  
156 of each gene within that group of genomes (Figures 1c and S2). For the purpose of comparing genes  
157 between genomes, we reasoned that it was more straightforward to identify groups of functionally  
158 closely related genes that also include recent paralogues, due to the complexities of dealing with  
159 orthology relationships across large numbers of genomes (especially for biosynthetic genes that are  
160 known to have a discontinuous taxonomic distribution and may undergo frequent duplications<sup>40</sup>).  
161 Therefore, decRiPPter first identifies the distribution of sequence identity values of protein-coding  
162 genes that can confidently be assigned to be orthologues, and uses this distribution to find groups of  
163 genes across genomes with orthologue-like mutual similarity. To identify a set of high-confidence  
164 orthologues, decRiPPter looks for genomic loci between which at least three contiguous genes are  
165 each other’s bidirectional best hits (BBHs, using DIAMOND<sup>41</sup>) between all possible genome pairs of  
166 the group of genomes analyzed, and assigned the center genes of these loci orthologue status,  
167 termed a true conserved orthologous gene (trueCOG)<sup>42</sup>. Since many orthologues are missed by only  
168 considering orthologues based on BBHs<sup>43</sup>, and to also include recent paralogues, we then further  
169 expanded the list of homologues with orthologue-like similarity by dynamically determining a cutoff  
170 between each genome pair based on the similarity of the trueCOGs shared between those genomes.  
171 This cutoff is used to find all highly similar gene pairs, which are then clustered with the Markov  
172 Clustering Algorithm (MCL<sup>44</sup>) into ‘clusters of orthologous genes’ (COGs). The number of COG  
173 members found for each gene is divided by the number of genomes in the query to get a COG score  
174 ranging from 0 to 1, reflecting how widespread the gene is across the set of query genomes. To  
175 validate our calculations, we analyzed the COG-scores of the highly conserved single-copy BUSCO  
176 gene set from OrthoDB<sup>45,46</sup>, as well as the COG-scores of the genes in the gene clusters predicted by  
177 antiSMASH. In line with our expectations, homologs of the BUSCO gene set averaged COG-scores of  
178 0.95 (Figure S5), while the COG-scores of the antiSMASH gene clusters were much lower, averaging  
179 0.311 +/- 0.249 for all BGCs, and 0.234 +/- 0.166 for RiPP BGCs (Figure S6). While the COG-scoring  
180 method requires a group of genomes to be analyzed rather than a single genome, we believe that  
181 the extra calculation significantly contributes in filtering false positives (see Table 1 and Figure S4). In  
182 addition, the COG scores aid in the gene cluster identification based on the assumption that gene  
183 clusters are generally sets of genes with similar absence/presence patterns across species (see  
184 Methods section).

185 For the final criterion, the algorithm dereplicates the identified clusters by comparing them to known  
186 RiPP BGCs. All putative BGCs are clustered based on domain content and precursor similarity using  
187 sequence similarity networking<sup>47</sup>, and compared to known RiPP BGCs from MiBiG<sup>48</sup>. In addition, the  
188 overlap between predicted RiPP BGCs and gene clusters found by antiSMASH<sup>49</sup> is determined (Figure  
189 1).

#### 190 **decRiPPter identifies 42 candidate novel RiPP classes in *Streptomyces***

191 While RiPPs are found in many different microorganisms, their presence in streptomycetes reflects  
192 perhaps the most diverse array of RiPP classes within a single genus. Streptomycetes produce a  
193 broad spectrum of RiPPs, namely lanthipeptides<sup>50</sup>, lasso peptides<sup>27</sup>, linear azol(in)e-containing  
194 peptides (LAPs)<sup>51</sup>, thiopeptides<sup>52</sup>, thioamide-containing peptides<sup>29</sup> and bottromycins<sup>53</sup>. Their  
195 potential as RiPP producers is further highlighted by a recent study showcasing the diversity of

196 lanthipeptide BGCs in *Streptomyces* and other actinobacteria<sup>54</sup>. Given the large variety of different  
197 families of natural products produced by this genus, we hypothesized it to be a likely source of novel  
198 RiPP classes, and sought to exhaustively mine it.

199 We started by running the pipeline described above on all publicly available *Streptomyces* genomes  
200 (1,295 genomes) from NCBI (Supplemental Document 3). Due to computational limits, the genomes  
201 were split into ten randomly selected groups to calculate the frequency of distribution of each gene  
202 (COG-scores). In general, the number of genomes that could be grouped together and the resulting  
203 cutoffs were found to vary with the amount of minimum trueCOGs required (Figure S3A). To make  
204 sure that as many genomes as possible could be compared at once, we set the cutoff for minimum  
205 number of trueCOGs at 10. Despite the low cutoff, the distribution of similarity scores between  
206 genome pairs still resembled a Gaussian distribution (Figure S3B). The bimodal distribution of the  
207 resulting COG-scores showed that the majority of the genes were either conserved in only a small  
208 portion of the genomes, or present in almost all genomes (Figure S4).

209 We then scanned all predicted products of genes as well as predicted ORFs in intergenic regions  
210 shorter than 100 amino acids (total  $7.19 * 10^7$ ) with the SVM classifier. While by far most of the  
211 queries scored below 0.5, a peak of queries scoring from 0.9 to 1.0 was observed (Figure S7). Seeking  
212 to be inclusive at this stage, we set the cutoff at 0.9, resulting in  $1.32 * 10^6$  candidate precursors  
213 passing this initial filter, thus filtering out 98.2 % of all candidates. Eliminating candidate precursors  
214 whose genes were completely overlapping reduced the number to  $8.17 * 10^5$  precursors (1.1 %).  
215 While, most probably, the vast majority of these are not RiPP precursors, it provides a suitably sized  
216 set of candidates to then enter the next stages of the decRiPPter workflow.

217 In our analyses, we found that the majority of RiPP BGCs contain the majority of biosynthetic genes  
218 on the same strand orientation as the precursor (MIBiG: 81.6%; antiSMASH RiPP BGCs: 73.1%). We  
219 therefore formed gene clusters using only the genes on the same strand as the predicted precursor.  
220 To create a training set, we divided all known RiPP BGCs and all antiSMASH RiPP BGCs found in the  
221 analyzed genome sequences into sections where each section contained only genes on the same  
222 strand. The core section was defined as the section that contained the most biosynthetic genes as  
223 detected by antiSMASH or as annotated in the MIBiG database. These sections were used as training  
224 sets to finetune distance and COG cutoffs for our gene cluster methods.

225 In a simple gene cluster method, genes were joined only using the intergenic distances as a cutoff.  
226 Using this method, we found that at a distance of 750 nucleotides, all MIBiG core sections were  
227 covered, and 91% of all antiSMASH core sections (Figure S8AB). However, using only distance may  
228 cause the gene cluster formation to overshoot into regions not associated with the BGC (e.g. Figure  
229 S2). We therefore created an alternative method, called the 'island method'. In this method, each  
230 gene is first joined with immediately adjacent genes that lie in the same strand orientation and have  
231 very small intergenic regions ( $\leq 50$  nucleotides), to form islands. These islands may subsequently be  
232 combined if they have similar average COG-scores (see materials and methods). We found that with  
233 this method, we could confidently cover our validation set, while slightly reducing the average size of  
234 the gene clusters ( $3.73 \pm 3.75$  vs  $3.44 \pm 3.53$ ; Figure S8CDE). In addition the variation of the COG  
235 scores within the gene clusters decreased, suggesting that fewer housekeeping genes would be  
236 added to detected biosynthetic gene clusters (Figure S8F).

237 Overlapping gene clusters were fused, resulting in  $7.18 \times 10^5$  gene clusters. To organize the results, all  
238 clusters were paired if their protein domain content was similar (Jaccard index of protein domains;  
239 cutoff: 0.5) and at least one of their predicted precursors showed sequence similarity (NCBI blastp;  
240 bitscore cutoff: 30). These cutoffs were used to distinguish between different RiPP subclasses (Figure  
241 S9). Clustering these pairs with MCL created 45,727 ‘families’ of gene clusters, containing 312,163  
242 gene clusters, while the remaining 406,105 gene clusters were left ungrouped.

243 Analysis of overlap between decRiPPter clusters and BGCs predicted by antiSMASH revealed that  
244 5,908 clusters overlapped, constituting 78% of antiSMASH hits, but only 0.8% of decRiPPter clusters  
245 (Table 1, row 2). To further narrow down our results, we applied several filters to increase the  
246 saturation of RiPP BGCs in our dataset. A mild filter, limiting the average COG score to 0.25 and  
247 requiring two biosynthetic genes and a gene encoding a transporter, increased the fraction of  
248 overlapping RiPP BGCs to 7.8% (Table 1, row 3). When only clusters associated with genes for a  
249 predicted peptidase and a predicted regulator were considered, and the average COG score was  
250 limited to 0.1, the fraction increased further to 14.4% (Table 1, row 4). While many antiSMASH RiPP  
251 BGCs were filtered out in the process (and, by extension, many unknown RiPP BGCs were likely also  
252 filtered out this way), we felt our odds of discovering novel RiPP families were highest when focusing  
253 on the dataset with the highest fraction of RiPP BGCs, and therefore applied the strict filter. The  
254 remaining 2,471 clusters of genes were clustered as described above. Since our efforts were aimed at  
255 finding new gene cluster families, we discarded groups of clusters with fewer than three members,  
256 leaving 1,036 gene clusters in 187 families. Families in which more than half of the gene clusters  
257 overlapped with antiSMASH non-RiPP BGCs were discarded as well, leaving only known RiPP families  
258 and new candidate RiPP families (893 gene clusters, 151 families; Figure 2).

259 Roughly a third (272) of the remaining gene clusters were members of known families of RiPPs,  
260 including lasso peptides, lanthipeptides, thiopeptides, bacteriocins and microcins. In addition, many  
261 of the other candidate clusters (55) contained genes common to known RiPP BGCs, such as those  
262 encoding YcaO cyclodehydratases and radical SAM-utilizing proteins (Figure 2). These gene clusters  
263 were not annotated as RiPP gene clusters by antiSMASH, but the presence of these genes alone or in  
264 combination with a suitable precursor can be used as a lead to find novel RiPP gene clusters<sup>24,29</sup>.

265 Each remaining family of gene clusters was manually investigated to filter out likely false positives  
266 from the candidates. Common reasons to discard gene clusters were functional annotations of  
267 candidate precursors as having a non-precursor function (e.g. homologous to ferredoxin or LysW<sup>55</sup>),  
268 annotations of the genes within a gene cluster related to primary metabolism (e.g. genes for cell-wall  
269 modifying enzymes), or other abnormalities (e.g. large intergenic gaps or very large gene cluster of  
270 more than 40 genes). Several modifying enzymes belonging to the candidate families were  
271 homologous to gene products involved in primary metabolism, such as 6-pyruvoyltetrahydropterin  
272 synthase or phosphoglycerate mutase. Given the low distribution (COG scores) of the genes encoding  
273 these enzymes, it seemed more likely to us that they were adapted from primary metabolism to play  
274 a role in secondary metabolism<sup>17</sup>. We therefore only discarded a gene cluster family if multiple clear  
275 relations to a known pathway were found. The remaining 42 candidate families were further grouped  
276 together into broader classes depending on whether a common enzyme was found (Figure 2).

277 A large group of families all contained one or more genes for ATP-grasp enzymes. ATP-grasp enzymes  
278 are all characterized by a typical ATP-grasp-fold, which binds ATP, which is hydrolyzed to catalyze a

279 number of different reactions. As such, these enzymes have a wide variety of functions in both  
280 primary and secondary metabolism, and their genes are present in a many different genomic  
281 contexts<sup>56</sup>. Involvement of ATP-grasp enzymes in RiPP biosynthesis has been reported for both  
282 microviridin<sup>57</sup> and pheganomycin<sup>23</sup>, where they catalyze macrocyclization and peptide ligation,  
283 respectively. The ATP-grasp enzymes involved in the biosynthesis of these products did not show  
284 direct similarity to any of the ATP-grasp ligases of these candidates, however, suggesting that these  
285 belong to yet to be uncovered biosynthetic pathways.

286 Among the candidate families were three families that contained homologs to *mauE*, and one that  
287 additionally contained a homolog of *mauD*. The proteins encoded by these genes, along with other  
288 proteins encoded in the *mau* gene cluster, are known to be involved in the maturation of of  
289 methylamine dehydrogenase, which is required for methylamine metabolism. MauE in particular has  
290 been speculated to play a role in the formation of disulfide bridges in the  $\beta$ -subunit of the protein,  
291 while the exact function of MauD remains unclear<sup>58</sup>. As no other orthologs of the *mau* cluster were  
292 found within the genomes of *Streptomyces sp.* 2112.3, *Streptomyces viridosporus* T7A or  
293 *Streptomyces sp.* CS081A, it is unlikely that these proteins carry out this function. Rather, the  
294 presence of these genes in a putative RiPP BGC suggests that they play a role in modification of RTEs  
295 or RiPP precursors. Supporting this hypothesis, each of these gene clusters contained a gene  
296 predicted to a encode for a precursor containing at least eight cysteine residues (Table S3).

297 Similarly, homologs of *hypE* and *hypF* were detected in a gene cluster containing another gene  
298 encoding an ATP-grasp ligase. Genes encoding these proteins are typically part of the *hyp* operon,  
299 which is involved in the maturation of hydrogenase. Specifically, the two proteins cooperate to  
300 synthesize a thiocyanate ligand, which is transferred onto an iron center and used as a catalyst<sup>59</sup>. No  
301 other homologs of genes in the *hyp* operon were detected, however, suggesting that these protein-  
302 coding genes have adopted a novel function.

303 The remaining 18 families could not be grouped under a single denominator, nor could any single  
304 enzyme be found that clearly distinguished these groups as RiPP or non-RiPP BGCs. A wide variety of  
305 enzymes was found to be encoded by these gene clusters, including p450 oxidoreductases,  
306 flavoproteins, aminotransferases, methyltransferases and phosphatases. In addition (and in line with  
307 features dominant in the positive training set), the predicted precursor peptides were often rich in  
308 cysteine, serine and threonine residues (Table S3), which contain reactive hydroxyl and sulfide  
309 moieties and are present in precursors of various known RiPP subclasses.

310 All candidate gene clusters presented here carry the features we selected, typical of RiPP BGCs: a low  
311 frequency of occurrence among the scanned genomes, a suitable precursor peptide, candidate  
312 modifying enzymes, transporters, regulators and peptidases. However, many known RiPP BGCs were  
313 removed, suggesting that there may be more uncharacterized RiPP families among the gene clusters  
314 we discarded. While the complete dataset could not be covered here, the command-line application  
315 of decRiPPter has been set up to allow users to set their own filters. In addition, decRiPPter runs are  
316 visualized in an HTML output, in which the results can be further browsed and filtered by Pfam  
317 domains and other criteria, allowing users to find candidate families according to their preferences.  
318 The results from this analysis of the strict and the mild filter is available at  
319 [http://www.bioinformatics.nl/~medem005/decRiPPter\\_strict/index.html](http://www.bioinformatics.nl/~medem005/decRiPPter_strict/index.html) and  
320 [http://www.bioinformatics.nl/~medem005/decRiPPter\\_mild/index.html](http://www.bioinformatics.nl/~medem005/decRiPPter_mild/index.html), respectively.



## 321 **Discovery of a novel family of lanthipeptides**

322 To validate the capacity of decRiPPter to find novel RiPP subclasses, we set out to experimentally  
323 characterize one of the candidate families (Figure 2; Other; red marker). Gene clusters belonging to  
324 this family shared several genes encoding flavoproteins, methyltransferases, oxidoreductases and  
325 occasionally a phosphotransferase. Importantly, the predicted precursor peptides encoded by these  
326 putative BGCs showed clear conservation of the N-terminal region, while varying more in the C-  
327 terminal region (Figure S10). This distinction is typical of RiPP precursors, as the N-terminal leader  
328 peptide is used as a recognition site for modifying enzymes, while the C-terminal core peptide can be  
329 more variable<sup>20</sup>.

330 One of the gene clusters belonging to this candidate family was identified in *Streptomyces*  
331 *pristinaespiralis* ATCC 25468 (fig 3A; Table 2). *S. pristinaespiralis* is known for the production of  
332 pristinamycin, and was selected for experimental work since the strain is genetically tractable<sup>60,61</sup>.  
333 The gene cluster was named after its origin (*spr*: *Streptomyces pristinaespiralis* RiPP), and the genes  
334 were named after their putative function.

335 The gene cluster contains four genes encoding putative precursor peptides, although only three of  
336 the peptides (*SprA1-A3*) showed similarity to each other and to the other peptides in the same family  
337 (Figure S10). The fourth predicted precursor peptide (encoded by *sprX*) did not align with any of the  
338 other peptides and was assumed to be a false positive. The products encoded by *sprA1* and *sprA2*  
339 were highly similar to one another compared to the *sprA3* gene product. Occurrence of two distinct  
340 genes for precursors within a single RiPP BGC is typical for two-component lanthipeptides<sup>62</sup>.

341 Most of the modifying enzymes present in the gene cluster had not previously been implicated in  
342 RiPP biosynthesis. The predicted *sprF2* gene product, however, shows high similarity to cysteine  
343 decarboxylases such as EpiD and CypD. These enzymes decarboxylate C-terminal cysteine residues,  
344 which is the first step in the formation of C-terminal loop structures called S-[(Z)-2-aminovinyl]-D-  
345 cysteine (AviCys) and S-[(Z)-2-aminovinyl]-(3S)-3-methyl-D-cysteine (AviMeCys)<sup>63</sup>. Several RiPP classes  
346 have been reported with this modification, including lanthipeptides, cypemycins and thioviridamides,  
347 although they are only consistently present in cypemycins and thioviridamides. This type of  
348 modification is less common among lanthipeptides, with only nine out of 120 lanthipeptide gene  
349 clusters in MIBiG encoding the required decarboxylase. Cysteine-decarboxylating genes are also  
350 present in non-RiPP gene clusters (Table S4) and are also associated with other metabolic  
351 pathways<sup>64</sup>.

352 A more detailed comparison with the gene clusters in MIBiG showed that two more genes from the  
353 thioviridamide gene cluster were homologous to two genes encoding a predicted  
354 phosphotransferase (*sprPT*) and a hypothetical protein (*sprH3*), respectively. Taken together with the  
355 homologous cysteine decarboxylase, it appeared that our gene cluster was distantly related to the  
356 thioviridamide gene cluster<sup>65</sup>. Thioviridamide-like compounds are primarily known for thioamide  
357 residues, for which a TfuA-associated YcaO is thought to be responsible<sup>29,66</sup>. However, a YcaO  
358 homologue was not encoded by the gene cluster, making it unlikely that this gene cluster should  
359 produce thioamide-containing RiPPs.

360 Two strains were created to help determine the natural product specified by the BGC. For the first  
361 strain, the entire gene cluster was replaced by an apramycin resistance cassette (*aac3(IV)*) by

362 homologous recombination with the pWHM3 vector<sup>67</sup> (*spr::apra*). In case the gene cluster was  
363 natively expressed, this strain should allow for easy identification of the natural product by  
364 comparative metabolomics. In the second approach, we sought to activate the BGC in case it was not  
365 natively expressed. To this end, we targeted the cluster-situated *luxR*-family transcriptional  
366 regulatory gene *sprR*. The *sprR* gene was expressed from the strong and constitutive *gapdh* promoter  
367 from *S. coelicolor* ( $p_{gapdh}$ ) on the integrative vector pSET152<sup>68</sup>. The resulting construct (pAK1) was  
368 transformed to *S. pristinaespiralis* by protoplast transformation.

369 To assess the expression of the gene cluster in the transformants, we analyzed changes in the global  
370 expression profiles in 2 days and 7 days old samples of NMMP-grown cultures using quantitative  
371 proteomics (Figure 3B). Aside from the regulator itself, six out of the sixteen other proteins were  
372 detected in the strain containing expression construct pAK1, while only SprPT could be detected in  
373 the strain carrying the empty vector pSET152. SprPT was also detected in the proteome of *spr::apra*,  
374 however, indicating a false positive. In the wild-type strain, SprT3 and SprR were detected, but only  
375 in a single replicate and at a much lower level. Overall, these results suggest that under the chosen  
376 growth conditions the gene cluster was expressed at very low amounts in wild-type cells, and was  
377 activated when the expression of the likely pathway-specific regulatory gene was enhanced. This  
378 makes *spr* a likely cryptic BGC.

379 To see if a RiPP was produced, the same cultures used for proteomics were separated into mycelial  
380 biomass and supernatant. The biomass was extracted with methanol, while HP20 beads were added  
381 to the supernatants to absorb secreted natural products. Analysis of the crude methanol extracts and  
382 the HP20 eluents with HPLC-MS revealed several peaks eluting between 5.5 and 7 minutes in the  
383 methanol extracts (fig 3C), which were not found in extracts from wild-type strain or the strain  
384 containing the empty vector. Feature detection with MZMine followed by statistical analysis with  
385 MetaboAnalyst revealed seven unique peaks, with  $m/z$  between 707.3534 and 918.0807 (Figure S11).  
386 The isotope patterns of these peaks showed that the six of the corresponding compounds were triply  
387 charged. Careful analysis of derivative peaks with mass increases consistent with Na- or K-addition,  
388 led to the conclusion that these peaks corresponded to the  $[M+3H]^{3+}$  adduct, suggesting a  
389 monoisotopic masses in the range of 2,604.273 and 2,754.242 Da. The highest signal came from the  
390 compound with monoisotopic mass of 2,703.245. Four of the other masses seemed to be related to  
391 this mass, as they were different in increments of 4, 14, or 16 Da (Table S5). We therefore reasoned  
392 that the mass of 2,703.245 Da was the final product, while others were incompletely processed  
393 peptides.

394 To further verify that the identified masses indeed belonged to the RiPP precursors in our gene  
395 cluster, we first removed the apramycin resistance cassette from *Spr::apra* using the pUWLCRE  
396 vector<sup>69</sup>, creating strain  $\Delta spr$ . The expression construct pAK1 and an empty pSET152 vector were  
397 transformed to the strain  $\Delta spr$ . When these strains were grown under the same conditions, the  
398 aforementioned peaks were not detected, further suggesting that indeed they belonged to products  
399 of this gene cluster (Figure S12).

400 Most masses were detected in only low amounts. In order to resolve this, we created a similar  
401 construct as pAK1, but this time using the low-copy shuttle vector pHJL401 as the vector<sup>70</sup>. The  
402 plasmid pAK2 was introduced into *S. pristinaespiralis* and the transformants grown in NMMP for 7  
403 days. Extraction of the mycelial biomass with methanol resulted in a higher abundance of the masses

404 previously detected (Figure S13). Consistent with the MS profiles of pAK1 transformants, also pAK2  
405 transformants produced an abundant peak corresponding to a monoisotopic mass of 2,703.245 Da,  
406 as well as a second peak corresponding to a monoisotopic mass of 2,553.260 Da. Most of the other  
407 masses could be related to one of these two masses, suggesting these are the final products, related  
408 to two distinct precursors (Tables S5 and S6).

409 We then performed MS-MS analysis of the extracts of the pAK2 transformants to identify the  
410 metabolites and their expected modifications, such as Avi(Me)Cys moieties. The fragmentation  
411 pattern of the mass of 2,703.245 Da could be assigned to the sprA3 precursor, when several  
412 modifications were applied (Figure 3D, Table S7). Similarly, fragments with a mass of 2,553.260 could  
413 be matched to the SprA2 precursors considering the same modifications (Figure S14; Table S8).

414 Among the predicted modifications were N-terminal methylation, which was supported by the  
415 presence of the methyltransferase *sprMe* in the gene cluster. Secondly, the C-terminal cysteine was  
416 predicted to have undergone oxidative decarboxylation (-46 Da), as expected based on the presence  
417 of the gene *sprF2* in the gene cluster. In addition, many of the serines and threonines could only be  
418 matched when their masses were altered by -16 or -18 Da. These mass differences are typical of  
419 dehydration (-18 Da) of the residues to dehydroalanine and dehydrobutyric acid. Reduction of these  
420 dehydrated amino acids (+2 Da) would then give rise to alanine and butyric acid residues, a  
421 modification which has been reported for lanthipeptides<sup>71</sup>.

422 To test for the presence of dehydrated serines and threonines, we treated the purified product with  
423 dithiothreitol (DTT), which covalently attaches to these residues via 1,4 nucleophilic addition<sup>72</sup>.  
424 Treatment with DTT resulted in the addition of up to two adducts, showing the presence of  
425 dehydrated residues, although one fewer than expected (Figure S15). The fact that two of the  
426 dehydrated residues are adjacent to one another may have resulted in steric hindrance, preventing  
427 full conversion.

428 Surprisingly, no fragments were found of the residues  $S^{-18}S^{-18}T^{-18}WC$  in the center of SprA3, or for the  
429 N-terminal  $T^{-18}, +28T^{-18}PVC$  region. Considering the other modifications typical of lanthipeptides, we  
430 hypothesized the presence of thioether crosslinks between the dehydrobutyric acids and cysteines.  
431 To find further support for this hypothesis, we treated the purified product of SprA3 with  
432 iodoacetamide (IAA). Iodoacetamide alkylates free cysteines, while cysteines in thioether bridges  
433 remain unmodified<sup>73</sup>. In agreement with our hypothesis, treatment with iodoacetamide did not  
434 affect the observed masses, despite the presence of three cysteines in the peptide (Figure S10). In  
435 addition, we hydrolyzed the purified peptide with 6M HCl at 110°C for 24h. Under these conditions,  
436 the amide bond should be hydrolyzed, while the thioether bond should be unaffected<sup>74</sup>. The  
437 resulting mixture of amino acids both contained masses corresponding to a cysteine linked to either  
438 a dehydrated serine, or to a twice methylated, dehydrated threonine (Table S10). The C-terminal  
439 predicted AviMeCys was not detected, although this may be explained by the presence of the alkene  
440 in the moiety, which are likely to react under acidic conditions.

441 Many of the other masses found were higher when compared to the product of SprA3 by increments  
442 of 16 Da, suggesting that the peptide was incompletely processed. The fragmentation patterns of  
443 these masses could not be unambiguously resolved (Figure S16). An unmodified serine or threonine  
444 could occur at several places within the precursor, and each of the possible outcomes would likely  
445 give rise to compounds with identical mass and very similar hydrophobic properties, which would not

446 be separated properly. Overall, these results further reinforce the idea that the compound with  
447 monoisotopic mass of 2,703.245 Da belongs to the fully modified product, while the others are  
448 derived from it.

#### 449 **The *sprH3/sprPT* gene pair is present in a wide variety of RiPP-like contexts**

450 Taken together, we have shown that the SprA3 precursor contained a number of posttranslational  
451 modifications that are typical of lantibiotics. The conversion of serine/threonine to alanine/butyric  
452 acid via reduction, the creation of an AviCys moiety and the crosslinks to form thioether bridges are  
453 all found in lanthipeptides, and are dependent on dehydration of serine and threonine residues. Four  
454 different sets of enzymes, called LanBC, LanM, LanKC and LanKL can catalyze these reactions in the  
455 biosynthesis of lanthipeptides and are used to designate the lanthipeptide type.

456 As stated before, no members of any of these enzyme families were found to be encoded by the  
457 gene cluster studied. However, *sprH3* and *sprPT* showed homology to two uncharacterized genes of  
458 the thioviridamide BGC. Thioviridamide contains an AviCys moiety, the formation of which requires a  
459 dehydrated serine residue. The enzymes responsible for dehydration and subsequent cyclization  
460 have not been identified yet<sup>65,75</sup>. Since both gene clusters share a common modification for which  
461 the enzyme is unknown, we hypothesized that *sprH3* and *sprPT* should be responsible for  
462 dehydration and cyclization, and thus are hallmarks for a new lanthipeptide subtype, which we  
463 designate type V.

464 Lanthipeptide core modifying enzymes catalyze the most prominent reaction in lanthipeptide  
465 maturation, and as such, are present in many different genetic contexts<sup>54</sup>. To validate that *SprH3* and  
466 *SprPT* are the sought-after modifying enzymes, we studied the distribution of the *SprH3/PT* gene pair  
467 across *Streptomyces* genomes analyzed by decRiPPter. Using CORASON<sup>76</sup> with the *sprPT* gene as a  
468 query yielded 195 homologs in various gene clusters (Figure 4). The *sprPT/sprH3* gene pair was  
469 completely conserved across all gene clusters for which an uninterrupted contig of DNA was  
470 available. , strongly supporting their functional interaction and joint involvement. Using the *sprH3*  
471 gene as a query yielded similar results (data not shown). A total of 391 orthologs of the gene pair  
472 were found outside *Streptomyces*, particularly in Actinobacteria (219) and Firmicutes (161; Figure  
473 S17). Distantly similar homologs of the gene pair were also identified in Cyanobacteria,  
474 Plantomycetes and Proteobacteria.

475 Among the 195 identified gene clusters in *Streptomyces*, the majority (131) overlapped with a gene  
476 cluster detected by decRiPPter, indicating that the gene pair was within short intergenetic distance  
477 from predicted precursor gene in the same strand orientation. A large fraction (80) also passed the  
478 strictest filtering (see Table I), showing that among these gene clusters were many encoding  
479 biosynthetic machinery, peptidases and regulators. In contrast, only nine of the gene clusters  
480 overlapped with a BGC identified by antiSMASH. Four of these showed the gene pair in apparent  
481 operative linkage with a bacteriocin gene cluster, marked as such by the presence of a DUF692  
482 domain, which is often associated with small prepeptides such as methanobactins. Another four gene  
483 clusters detected by decRiPPter were only overlapping due to the gene pair being on the edge of a  
484 neighboring gene cluster.

485 The genetic context of the gene pairs showed a wide variation (Figure 4, right side). While some gene  
486 clusters were mostly homologous to the *spr* gene cluster (Figure 4, group g-h), others shared only a

487 few genes (groups a and d), and some only shared the gene pair itself (groups b, c and e). Many other  
488 predicted enzyme families were found to be encoded inside these gene clusters, including YcaO-like  
489 proteins, glycosyltransferases, sulfotransferases and aminotransferases. The large variation in  
490 genetic contexts combined with the clear association with a predicted precursor indicates that this  
491 gene pair likely plays a role in many different RiPP-associated genetic contexts, supporting their  
492 proposed role as a core gene pair.

493 Furthermore, we searched for genes encoding enzymes whose functions are dependent on a  
494 lanthipeptide dehydration in their substrate, to find if they were associated with the *sprPT/sprH3*  
495 gene pair. Both within and outside *Streptomyces*, homologs of *sprF1* and *sprF2* were often found  
496 associated with the gene pair (*sprF1*: 251/586; 40.1%; *sprF2*: 281/586; 48.0%; Table S11). Another  
497 modification dependent on the presence of dehydrated serine and threonine residues is the  
498 conversion of these to alanine and butyric acid, respectively, catalyzed by LtnJ and CrnJ<sup>71</sup>. Outside  
499 *Streptomyces*, the genomic surroundings of the *sprPT/sprH3* gene pair occasionally contained  
500 homologs of the *ltnJ* gene (40/391; 10.1%), further implying that these genes carry out the canonical  
501 dehydration reactions.

502 A similar modification was observed for SprA2 and SprA3, despite that no homologs of the genes  
503 encoding LtnJ or CrnJ were identified within the *spr* gene cluster. However, *sprOR* encodes a putative  
504 oxidoreductase, and thus candidates for this modification. Supporting this, orthologs of *sprOR* were  
505 found frequently associated with either canonical lanthipeptide BGCs or the *sprPT/sprH3* gene pair  
506 (lanthipeptide: 124/462; *sprPT/sprH3*: 137/462; Table S10). One of these lanthipeptide BGCs showed  
507 high homology to the lacticin 3147 BGCs from *Lactococcus lactis*. Lacticin 3147 contains several D-  
508 alanine residues as a result of conversion of dehydrated serine residues<sup>77</sup>. While all the genes,  
509 including the precursors, were well conserved between the two gene clusters, the *ltnJ* gene had been  
510 replaced by an *sprOR* homolog, suggesting that their gene products catalyze similar functions (Figure  
511 S18).

## 512 **Conclusion and final perspectives**

513 The continued expansion of available genomic sequence data has allowed for discovery of large  
514 reservoirs of natural product BGCs, fueled by sophisticated genome mining methods. These methods  
515 must make tradeoffs between novelty and accuracy<sup>12</sup>. Tools primarily aimed at accuracy reliably  
516 discover large numbers of known natural product BGCs, but are limited by specific genetical markers.  
517 On the other hand, while tools aimed at novelty may discovery new natural products, these tools  
518 have to sacrifice on accuracy, resulting in a larger amount of false positives.

519 Here, we take a new approach to natural product genome mining, aimed specifically at the discovery  
520 of novel types of RiPPs. To this end, we built decRiPPter, an integrative approach to RiPP genome  
521 mining, based on general features of RiPP BGCs rather than selective presence of specific types of  
522 enzymes and domains. To increase the accuracy of our methods, we base detection of the RiPP BGCs  
523 on the one thing all RiPP BGCs have in common: a gene encoding a precursor peptide. With this  
524 method, we identify 42 candidate novel RiPP families, mined from only 1,295 *Streptomyces* genomes.  
525 These families are undetected by antiSMASH, and show no clear markers identifying them as  
526 belonging to previously known RiPP BGC classes. While the approach to RiPP genome mining taken  
527 here inevitably gives rise to a higher number of false positives, we feel that such a 'low-confidence /  
528 high novelty' approach<sup>12</sup> is necessary for the discovery of completely novel RiPP families.  
529 Additionally, users are able to set their own filters for the identified gene clusters, allowing them to  
530 search candidate RiPP families containing specific enzymes or enzyme types within a much more  
531 confined search space compared to manual genome browsing.

532 The product of one of the candidate classes was characterized as the first member of a new class of  
533 lanthipeptides (termed 'type V') that was not detected by any other RiPP genome mining tool.  
534 Variants of this gene cluster are widespread across *Streptomyces* species, further expanding one of  
535 the most widely studied RiPP families. In addition, two proposed core genes were used to expand the  
536 family by finding additional homologs in *Actinobacteria* and *Firmicutes*. Taken together, this work  
537 shows that known RiPP families only cover part of the complete genomic landscape, and that many  
538 more RiPP families likely remain to be discovered, especially when expanding the search space to the  
539 broader bacterial tree of life.

540

541

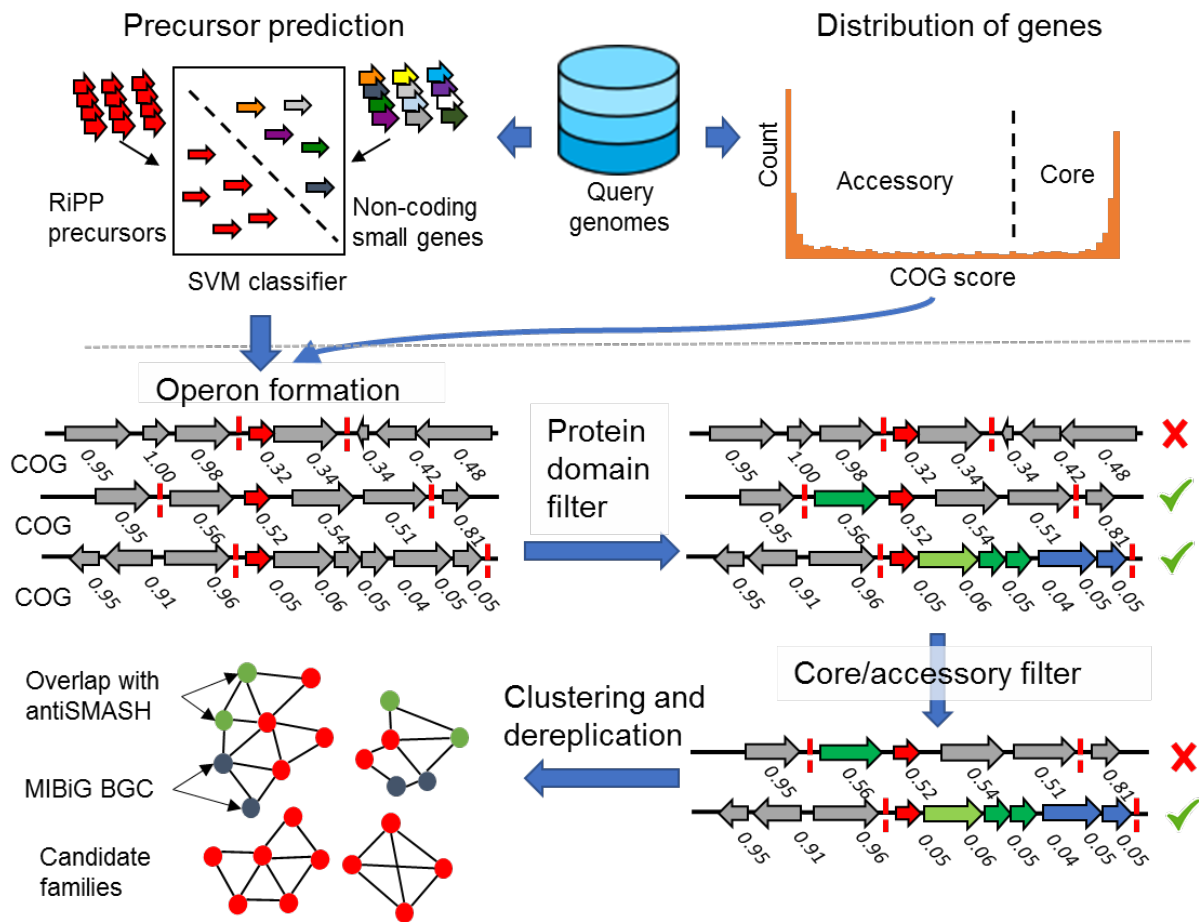

542

543 **Figure 1.** decRiPPter pipeline for the detection of novel RiPP families. From a given group of  
 544 genomes, all genes smaller than 100 amino acids are analyzed by the SVM classifier, which finds  
 545 candidate precursors. The gene clusters formed around the precursors are analyzed for specific  
 546 protein domains. In addition, all COG scores are calculated to act as an additional filter, and to aid in  
 547 gene cluster detection. The remaining gene clusters are clustered together and with MIBiG gene  
 548 clusters to derePLICATE and organize the results. In addition, overlap with antiSMASH detected BGCs  
 549 is analyzed (4).

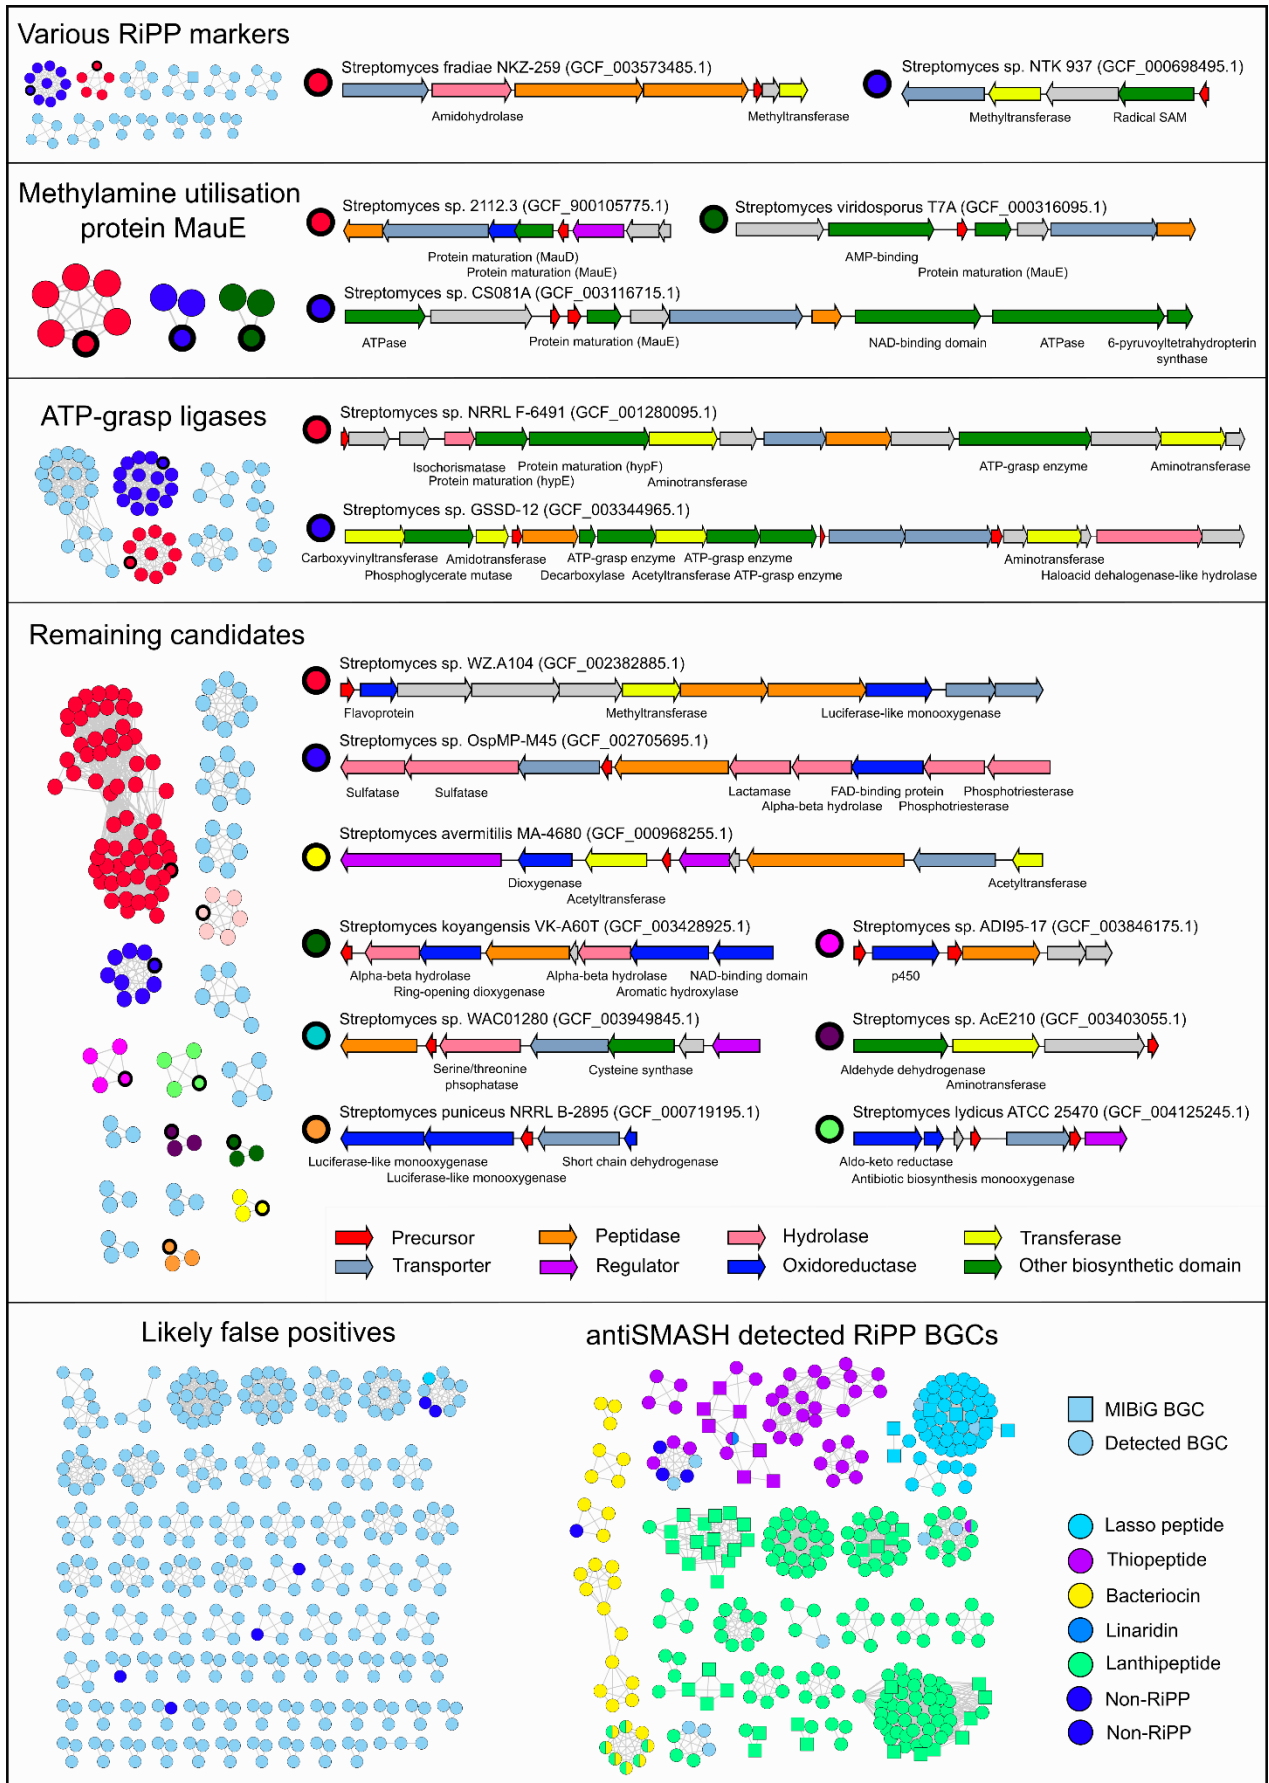

550

551



552 **Figure 2. decRiPPter finds 42 candidate RiPP families with a large variety of encoded modifying**  
553 **enzymes and precursors** . Gene clusters found in 1,295 *Streptomyces* genomes were passed through  
554 a strict filter and grouped together (see main text). Arrow colors indicate enzyme family of the  
555 product, and the description of gene products is given below the arrows. Roughly a third of the  
556 remaining candidates overlapped with or were similar to RiPP BGCs predicted by antiSMASH.  
557 Another third of the remaining candidates were discarded as likely false positives (see main text). Of  
558 the remaining 42 candidate RiPP families, 15 example gene clusters are displayed.

559

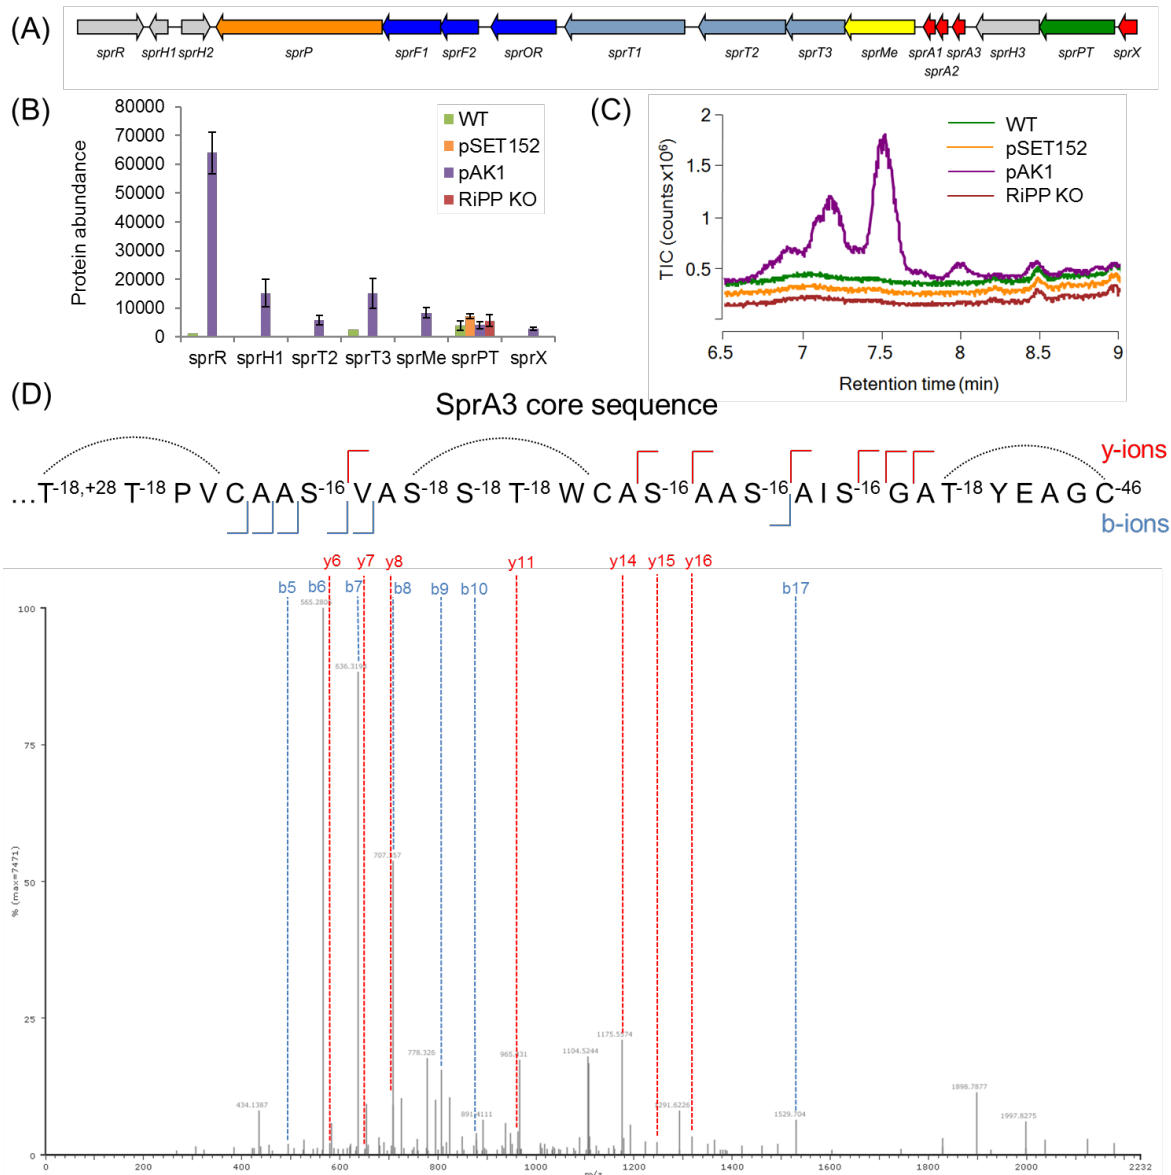

560

561 **Figure 3. The *Streptomyces pristinaespiralis* RiPP (*spr*) gene cluster produces a highly modified**  
 562 **RiPP.** A) The *spr* gene cluster encodes three putative precursors, three transporters, a peptidase and  
 563 an assortment of modifying enzymes (see Table 1). B) Protein abundance of the products of the *spr*  
 564 gene cluster in *S. pristinaespiralis* ATCC 25468 and derived strains. Strains were grown in NMMP and  
 565 samples were taken after 2 and 7 days. Enhanced expression of the regulator (from construct pAK1)  
 566 resulted in the partial activation of the gene cluster. Genes that could not be detected are not  
 567 illustrated. C) Chromatogram of crude extracts from strains grown under the same conditions as  
 568 under A), samples after 7 days. Several peaks were detected in the extract from the strain with  
 569 expression construct pAK1 between 7 and 8 minutes. C) b and y ions detected from one of the  
 570 predominant peaks found in the crude extract (corresponding to monoisotopic mass of 2703.235  
 571 Da). The fragmentation pattern could be matched to the *sprA3* precursor.

572

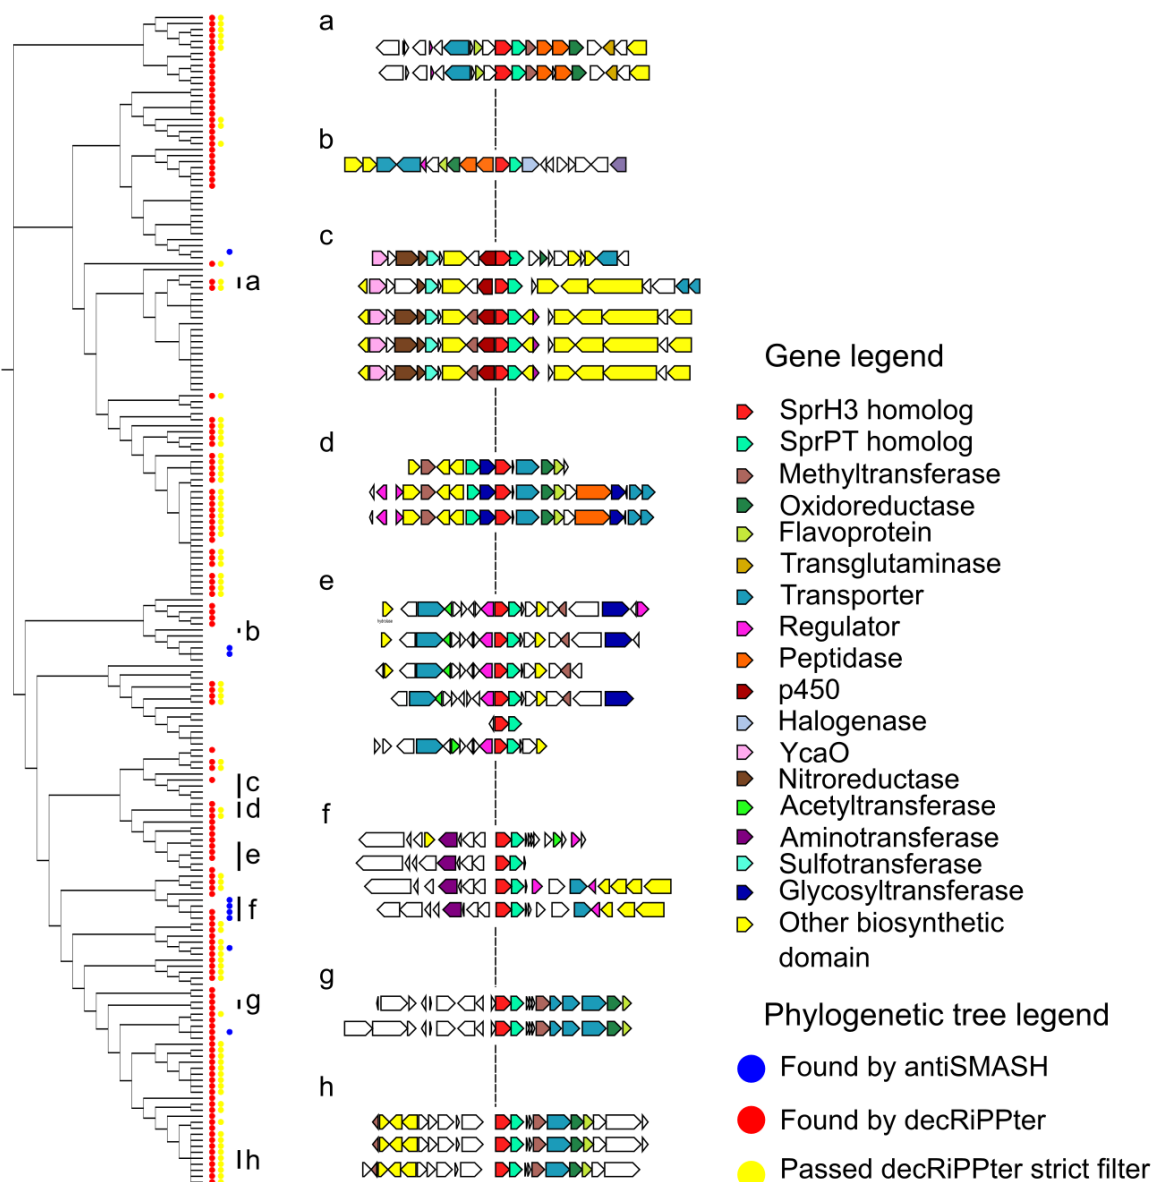

573

574 **Figure 4. Orthologs of *sprPT* and *sprH3* cooccur in a wide variety of genetic contexts.** (Left side)  
 575 Phylogenetic tree of gene clusters containing homologs of *sprPT* and *sprH3*, visualized by CORASON<sup>76</sup>.  
 576 A red dot indicates that the genes were present in a gene cluster found by decRiPPter, a yellow dot  
 577 that it passed the strict filter (see Table 1 for details). A blue dot indicates overlap with a BGC  
 578 identified by antiSMASH. (Right side) Several gene clusters with varying genetic contexts are  
 579 displayed. Group (g) represents the query gene cluster. The genetic context varies, while the gene  
 580 pair itself is conserved. Color indicates predicted enzymatic activity of the gene products as described  
 581 in the legend.

582

583

584 **Table 1. Increasing the strictness of the filter used on the found gene clusters results in a higher**  
 585 **saturation of RiPP BGCs.**

| Filter | Filter details                                                                                                                                                                                                                                                                                                                                                                                   | Number of detected gene clusters | Number of detected gene clusters overlapping with antiSMASH RiPP BGCs | Percentage of detected gene clusters overlapping with RiPP BGCs |
|--------|--------------------------------------------------------------------------------------------------------------------------------------------------------------------------------------------------------------------------------------------------------------------------------------------------------------------------------------------------------------------------------------------------|----------------------------------|-----------------------------------------------------------------------|-----------------------------------------------------------------|
| None   | -                                                                                                                                                                                                                                                                                                                                                                                                | 718268                           | 5908                                                                  | 0.8%                                                            |
| Mild   | Gene cluster COG score: $\leq 0.25$<br>In the gene cluster: <ul style="list-style-type: none"> <li>• <math>\geq 3</math> genes</li> <li>• <math>\geq 2</math> biosynthetic genes</li> </ul> In or around the gene cluster: <ul style="list-style-type: none"> <li>• <math>\geq 1</math> transporter</li> </ul>                                                                                   | 21419                            | 1678                                                                  | 7.8%                                                            |
| Strict | Gene cluster COG score: $\leq 0.10$<br>In the gene cluster: <ul style="list-style-type: none"> <li>• <math>\geq 3</math> genes</li> <li>• <math>\geq 2</math> biosynthetic genes</li> </ul> In or around the gene cluster: <ul style="list-style-type: none"> <li>• <math>\geq 1</math> transporter</li> <li>• <math>\geq 1</math> regulator</li> <li>• <math>\geq 1</math> peptidase</li> </ul> | 2471                             | 357                                                                   | 14.4%                                                           |

586

587 **Table 2. Annotation of the *Streptomyces pristinaespiralis* RiPP (*spr*) gene cluster.**

| Gene name | Accession  | NCBI Annotation                                  | Protein domains found                                                         | Proposed function                                   |
|-----------|------------|--------------------------------------------------|-------------------------------------------------------------------------------|-----------------------------------------------------|
| sprR      | ALC22061.1 | LuxR family transcriptional regulator            |                                                                               | Cluster-specific regulator                          |
| sprH1     | ALC22062.1 | hypothetical protein                             |                                                                               | Unknown                                             |
| sprH2     | ALC22063.1 | hypothetical protein                             |                                                                               | Unknown                                             |
| sprP      | ALC22064.1 | Peptidase M16 domain-containing protein          | PF00675<br>Insulinase<br>PF05193<br>Peptidase M16 inactive domain             | RiPP maturation protease                            |
| sprPT1    | ALC22065.1 | Flavoprotein                                     | PF01636<br>Phosphotransferase                                                 | Cysteine decarboxylation                            |
| sprF      | ALC22066.1 | Flavoprotein                                     | PF02441<br>Flavoprotein                                                       | Cysteine decarboxylation                            |
| sprOR     | ALC22067.1 | 5,10-methylene tetrahydromethanopterin reductase | PF00291<br>Luciferase-like monooxygenase                                      | Reduction of dehydroalanine and dehydrobutyric acid |
| sprT1     | ALC22068.1 | ABC transporter ATP-binding protein              | PF00005<br>ABC transporter<br>PF00664<br>ABC transporter transmembrane region | Transport                                           |
| sprT2     | ALC22069.1 | ABC transporter                                  | PF12698<br>ABC-2 family transporter protein                                   | Transport                                           |
| sprT3     | ALC22070.1 | ABC transporter ATP-binding protein              | PF00005<br>ABC transporter<br>PF13732<br>Domain of unknown function (DUF4162) | Transport                                           |
| sprMe     | ALC22071.1 | carminomycin 4-O-methyltransferase               | PF00891<br>O-methyltransferase domain                                         | N-terminal methylation                              |
| sprA1     | ALC22072.1 | hypothetical protein                             |                                                                               | RiPP precursor                                      |
| sprA2     | ALC22073.1 | hypothetical protein                             |                                                                               | RiPP precursor                                      |
| sprA3     | ALC22074.1 | hypothetical protein                             |                                                                               | RiPP precursor                                      |
| sprH3     | ALC22075.1 | hypothetical protein                             | PF17914<br>HopA1 effector protein family                                      | Dehydration/cyclization                             |
| sprPT2    | ALC22076.1 | hypothetical protein                             | PF01636<br>Phosphotransferase                                                 | Dehydration/cyclization                             |
| sprX      | ALC22077.1 | hypothetical protein                             |                                                                               | Unknown                                             |

588

589

590

591 **Table 3. Co-occurrence of genes found in the *spr* gene cluster with homologs of *sprPT* in the**  
592 **analyzed 1,295 *Streptomyces* strains.**

| Gene name    | Co-occurrence with <i>sprPT</i><br>(percentage) |
|--------------|-------------------------------------------------|
| <i>sprH3</i> | 99.49                                           |
| <i>sprMe</i> | 20                                              |
| <i>sprT1</i> | 35.38                                           |
| <i>sprT2</i> | 12.31                                           |
| <i>sprT3</i> | 12.82                                           |
| <i>sprOR</i> | 64.62                                           |
| <i>sprF1</i> | 39.5                                            |
| <i>sprF2</i> | 68.72                                           |
| <i>sprP</i>  | 38.5                                            |
| <i>sprH1</i> | 9.0                                             |
| <i>sprH2</i> | 2.0                                             |
| <i>sprR</i>  | 28.5                                            |
| <i>sprA1</i> | 1.03                                            |
| <i>sprA2</i> | 1.03                                            |
| <i>sprA3</i> | 16.92                                           |

593

## 594 References

- 595 1. Cooper MA, Shlaes D. Fix the antibiotics pipeline. *Nature*. 2011;472(7341):32.  
596 doi:10.1038/472032a
- 597 2. Payne DJ, Gwynn MN, Holmes DJ, Pompliano DL. Drugs for bad bugs: Confronting the  
598 challenges of antibacterial discovery. *Nat Rev Drug Discov*. 2007;6(1):29-40.  
599 doi:10.1038/nrd2201
- 600 3. Davies J. Origins and evolution of antibiotic resistance. *Microbiologia*. 1996;12(1):9-16.  
601 doi:10.1128/mmbr.00016-10
- 602 4. Lewis K. Platforms for antibiotic discovery. *Nat Rev Drug Discov*. 2013;12(5):371-387.  
603 doi:10.1038/nrd3975
- 604 5. Kolter R, Van Wezel GP. Goodbye to brute force in antibiotic discovery? *Nat Microbiol*.  
605 2016;1(2):1-2. doi:10.1038/nmicrobiol.2015.20
- 606 6. Barka EA, Vatsa P, Sanchez L, et al. Taxonomy, Physiology, and Natural Products of  
607 Actinobacteria. *Microbiol Mol Biol Rev*. 2016;80(1):1-43. doi:10.1128/mmbr.00019-15
- 608 7. Bérdy J. Thoughts and facts about antibiotics: Where we are now and where we are heading. *J*  
609 *Antibiot (Tokyo)*. 2012;65(8):385-395. doi:10.1038/ja.2012.27
- 610 8. Bentley SD, Chater KF, Cerdeño-Tárraga AM, et al. Complete genome sequence of the model  
611 actinomycete *Streptomyces coelicolor* A3(2). *Nature*. 2002;417(6885):141-147.  
612 doi:10.1038/417141a
- 613 9. van der Aart LT, Nouioui I, Kloosterman A, et al. Polyphasic classification of the gifted natural  
614 product producer *Streptomyces roseifaciens* sp. nov. *Int J Syst Evol Microbiol*. 2019;69(4):899-  
615 908. doi:10.1099/ijsem.0.003215
- 616 10. Rutledge PJ, Challis GL. Discovery of microbial natural products by activation of silent  
617 biosynthetic gene clusters. *Nat Rev Microbiol*. 2015;13(8):509-523. doi:10.1038/nrmicro3496
- 618 11. van der Meij A, Worsley SF, Hutchings MI, van Wezel GP. Chemical ecology of antibiotic  
619 production by actinomycetes. *FEMS Microbiol Rev*. 2017. doi:10.1093/femsre/fux005
- 620 12. Medema MH, Fischbach M a. Computational approaches to natural product discovery. *Nat*  
621 *Chem Biol*. 2015;11:639-648.
- 622 13. Blin K, Shaw S, Steinke K, et al. antiSMASH 5.0: updates to the secondary metabolite genome  
623 mining pipeline. *Nucleic Acids Res*. 2019;47(W1):W81-W87. doi:10.1093/nar/gkz310
- 624 14. Skinnider MA, Merwin NJ, Johnston CW, Magarvey NA. PRISM 3: Expanded prediction of  
625 natural product chemical structures from microbial genomes. *Nucleic Acids Res*.  
626 2017;45(W1):W49-W54. doi:10.1093/nar/gkx320
- 627 15. van Heel AJ, de Jong A, Song C, Viel JH, Kok J, Kuipers OP. BAGEL4: a user-friendly web server  
628 to thoroughly mine RiPPs and bacteriocins. *Nucleic Acids Res*. 2018;46(W1):W278-W281.  
629 doi:10.1093/nar/gky383
- 630 16. Cimermancic P, Medema MH, Claesen J, et al. Insights into secondary metabolism from a  
631 global analysis of prokaryotic biosynthetic gene clusters. *Cell*. 2014;158(2):412-421.  
632 doi:10.1016/j.cell.2014.06.034

- 633 17. Cruz-Morales P, Kopp JF, Martínez-Guerrero C, et al. Phylogenomic Analysis of Natural  
634 Products Biosynthetic Gene Clusters Allows Discovery of Arseno-Organic Metabolites in Model  
635 Streptomyces. *Genome Biol Evol.* 2016;8(6):1906-1916. doi:10.1093/gbe/evw125
- 636 18. Séelem-Mojica N, Aguilar C, Gutiérrez-García K, Martínez-Guerrero CE, Barona-Gómez F.  
637 Evomining reveals the origin and fate of natural product biosynthetic enzymes. *Microb*  
638 *Genomics.* 2019;5(12). doi:10.1099/mgen.0.000260
- 639 19. Arnison PG, Bibb MJ, Bierbaum G, et al. Ribosomally synthesized and post-translationally  
640 modified peptide natural products: overview and recommendations for a universal  
641 nomenclature. *Nat Prod Rep.* 2013;30(1):108-160. doi:10.1039/C2NP20085F
- 642 20. Oman TJ, Van Der Donk WA. Follow the leader: The use of leader peptides to guide natural  
643 product biosynthesis. *Nat Chem Biol.* 2010. doi:10.1038/nchembio.286
- 644 21. Freeman MF, Gurgui C, Helf MJ, et al. Metagenome mining reveals polytheonamides as  
645 posttranslationally modified ribosomal peptides. *Science (80- ).* 2012;338(6105):387-390.  
646 doi:10.1126/science.1226121
- 647 22. Ogasawara Y, Kawata J, Noike M, Satoh Y, Furihata K, Dairi T. Exploring Peptide Ligase  
648 Orthologs in Actinobacteria—Discovery of Pseudopeptide Natural Products, Ketomemcins.  
649 2016. doi:10.1021/acschembio.6b00046
- 650 23. Noike M, Matsui T, Ooya K, et al. A peptide ligase and the ribosome cooperate to synthesize  
651 the peptide pheganomycin. *Nat Chem Biol.* 2015;11(1):71-76. doi:10.1038/nchembio.1697
- 652 24. Morinaka BI, Lakis E, Verest M, et al. Natural noncanonical protein splicing yields products  
653 with diverse  $\beta$ -amino acid residues. *Science.* 2018;359(6377):779-782.  
654 doi:10.1126/science.aao0157
- 655 25. Caruso A, Bushin LB, Clark KA, Martinie RJ, Seyedsayamdost MR. A Radical Approach to  
656 Enzymatic  $\beta$ -Thioether Bond Formation A Radical Approach to Enzymatic  $\beta$ -Thioether Bond  
657 Formation. 2018. doi:10.1021/jacs.8b11060
- 658 26. Hudson GA, Burkhart BJ, DiCaprio AJ, et al. Bioinformatic Mapping of Radical S -  
659 Adenosylmethionine-Dependent Ribosomally Synthesized and Post-Translationally Modified  
660 Peptides Identifies New C $\alpha$ , C $\beta$ , and C $\gamma$ -Linked Thioether-Containing Peptides. *J Am Chem Soc.*  
661 May 2019;jacs.9b01519. doi:10.1021/jacs.9b01519
- 662 27. Tietz JI, Schwalen CJ, Patel PS, et al. A new genome-mining tool redefines the lasso peptide  
663 biosynthetic landscape. *Nat Chem Biol.* 2017;13(5):470-478. doi:10.1038/nchembio.2319
- 664 28. Schwalen CJ, Hudson GA, Kille B, Mitchell DA. Bioinformatic Expansion and Discovery of  
665 Thiopeptide Antibiotics. *J Am Chem Soc.* 2018;140(30):9494-9501. doi:10.1021/jacs.8b03896
- 666 29. Santos-Aberturas J, Chandra G, Frattaruolo L, et al. Uncovering the unexplored diversity of  
667 thioamidated ribosomal peptides in Actinobacteria using the RiPPER genome mining tool.  
668 *bioRxiv.* December 2018:494286. doi:10.1101/494286
- 669 30. Santos ELC de los. NeuRiPP: Neural network identification of RiPP precursor peptides. *bioRxiv.*  
670 May 2019:616060. doi:10.1101/616060
- 671 31. Merwin NJ, Mousa WK, Dejong CA, et al. DeepRiPP integrates multiomics data to automate  
672 discovery of novel ribosomally synthesized natural products. *Proc Natl Acad Sci U S A.*  
673 2020;117(1):371-380. doi:10.1073/pnas.1901493116



- 674 32. Kautsar SA, Blin K, Shaw S, et al. MIBiG 2.0: a repository for biosynthetic gene clusters of  
675 known function. *Nucleic Acids Res.* 2020;48(D1):D454-D458. doi:10.1093/nar/gkz882
- 676 33. Mitchell A, Chang HY, Daugherty L, et al. The InterPro protein families database: The  
677 classification resource after 15 years. *Nucleic Acids Res.* 2015;43(D1):D213-D221.  
678 doi:10.1093/nar/gku1243
- 679 34. Cimermancic P, Medema MH, Claesen J, et al. Insights into secondary metabolism from a  
680 global analysis of prokaryotic biosynthetic gene clusters. *Cell.* 2014;158(2):412-421.  
681 doi:10.1016/j.cell.2014.06.034
- 682 35. El-Gebali S, Mistry J, Bateman A, et al. The Pfam protein families database in 2019. *Nucleic  
683 Acids Res.* 2019;47(D1):D427-D432. doi:10.1093/nar/gky995
- 684 36. Haft DH. TIGRFAMs: a protein family resource for the functional identification of proteins.  
685 *Nucleic Acids Res.* 2001;29(1):41-43. doi:10.1093/nar/29.1.41
- 686 37. Choudoir M, Pepe-Ranney C, Buckley D. Diversification of Secondary Metabolite Biosynthetic  
687 Gene Clusters Coincides with Lineage Divergence in *Streptomyces*. *Antibiotics.* 2018;7(1):12.  
688 doi:10.3390/antibiotics7010012
- 689 38. Xu L, Ye K-X, Dai W-H, Sun C, Xu L-H, Han B-N. Comparative Genomic Insights into Secondary  
690 Metabolism Biosynthetic Gene Cluster Distributions of Marine *Streptomyces*. *Mar Drugs.*  
691 2019;17(9):498. doi:10.3390/md17090498
- 692 39. Amos GCA, Awakawa T, Tuttle RN, et al. Comparative transcriptomics as a guide to natural  
693 product discovery and biosynthetic gene cluster functionality. doi:10.1073/pnas.1714381115
- 694 40. Medema MH, Cimermancic P, Sali A, Takano E, Fischbach MA. A Systematic Computational  
695 Analysis of Biosynthetic Gene Cluster Evolution: Lessons for Engineering Biosynthesis. *PLoS  
696 Comput Biol.* 2014;10(12). doi:10.1371/journal.pcbi.1004016
- 697 41. Buchfink B, Xie C, Huson DH. Fast and sensitive protein alignment using DIAMOND. *Nat  
698 Methods.* 2015;12(1):59-60. doi:10.1038/nmeth.3176
- 699 42. Wolf YI, Koonin E V. A Tight Link between Orthologs and Bidirectional Best Hits in Bacterial  
700 and Archaeal Genomes. *Genome Biol Evol.* 2012;4(12):1286-1294. doi:10.1093/gbe/evs100
- 701 43. Dalquen DA, Dessimoz C. Bidirectional Best Hits Miss Many Orthologs in Duplication-Rich  
702 Clades such as Plants and Animals. *Genome Biol Evol.* 2013;5(10):1800-1806.  
703 doi:10.1093/gbe/evt132
- 704 44. Van Dongen S. Graph Clustering Via a Discrete Uncoupling Process. *SIAM J Matrix Anal Appl.*  
705 2008;30(1):121-141. doi:10.1137/040608635
- 706 45. Kriventseva E V., Kuznetsov D, Tegenfeldt F, et al. OrthoDB v10: Sampling the diversity of  
707 animal, plant, fungal, protist, bacterial and viral genomes for evolutionary and functional  
708 annotations of orthologs. *Nucleic Acids Res.* 2019;47(D1):D807-D811.  
709 doi:10.1093/nar/gky1053
- 710 46. Waterhouse RM, Seppey M, Simao FA, et al. BUSCO applications from quality assessments to  
711 gene prediction and phylogenomics. *Mol Biol Evol.* 2018;35(3):543-548.  
712 doi:10.1093/molbev/msx319
- 713 47. Atkinson HJ, Morris JH, Ferrin TE, Babbitt PC. Using sequence similarity networks for

- 714 visualization of relationships across diverse protein superfamilies. *PLoS One*. 2009;4(2).  
715 doi:10.1371/journal.pone.0004345
- 716 48. Medema MH, Kottmann R, Yilmaz P, et al. Minimum Information about a Biosynthetic Gene  
717 cluster. *Nat Chem Biol*. 2015;11(9):625-631. doi:10.1038/nchembio.1890
- 718 49. Blin K, Wolf T, Chevrette MG, et al. antiSMASH 4.0—improvements in chemistry prediction  
719 and gene cluster boundary identification. *Nucleic Acids Res*. 2017;(1):1-6.  
720 doi:10.1093/nar/gkx319
- 721 50. Kersten RD, Yang YL, Xu Y, et al. A mass spectrometry-guided genome mining approach for  
722 natural product peptidogenomics. *Nat Chem Biol*. 2011;7(11):794-802.  
723 doi:10.1038/nchembio.684
- 724 51. Onaka H, Nakaho M, Hayashi K, Igarashi Y, Furumai T. Cloning and characterization of the  
725 goadsporin biosynthetic gene cluster from *Streptomyces* sp. TP-A0584. *Microbiology*.  
726 2005;151(12):3923-3933. doi:10.1099/mic.0.28420-0
- 727 52. Kelly WL, Pan L, Li C. Thiostrepton Biosynthesis: Prototype for a New Family of Bacteriocins.  
728 doi:10.1021/ja807890a
- 729 53. Gomez-Escribano JP, Song L, Bibb MJ, Challis GL. Posttranslational  $\beta$ -methylation and  
730 macrolactamidation in the biosynthesis of the bottromycin complex of ribosomal peptide  
731 antibiotics. *Chem Sci*. 2012;3(12):3522-3525. doi:10.1039/c2sc21183a
- 732 54. Zhang Q, Doroghazi JR, Zhao X, Walker MC, Van Der Donk WA. Expanded Natural Product  
733 Diversity Revealed by Analysis of Lanthipeptide-Like Gene Clusters in Actinobacteria. 2015.  
734 doi:10.1128/AEM.00635-15
- 735 55. Horie A, Tomita T, Saiki A, et al. Discovery of proteinaceous N-modification in lysine  
736 biosynthesis of *Thermus thermophilus*. *Nat Chem Biol*. 2009;5(9):673-679.  
737 doi:10.1038/nchembio.198
- 738 56. Fawaz M V, Topper M, Firestone SM. The ATP-Grasp Enzymes. *Bioorg Chem*. 2011;39(5-6):185-  
739 191. doi:10.1016/j.bioorg.2011.08.004
- 740 57. Ziemert N, Ishida K, Weiz A, Hertweck C, Dittmann E. Exploiting the natural diversity of  
741 microviridin gene clusters for discovery of novel tricyclic depsipeptides. *Appl Environ*  
742 *Microbiol*. 2010;76(11):3568-3574. doi:10.1128/AEM.02858-09
- 743 58. Van Der Palen CJNM, Reijnders WNM, De Vries S, Duine JA, Rob ;, Van Spanning JM. *MauE and*  
744 *MauD Proteins Are Essential in Methylamine Metabolism of Paracoccus Denitrificans*.
- 745 59. Jacobi A, Rossmann R, Böck A. The hyp operon gene products are required for the maturation  
746 of catalytically active hydrogenase isoenzymes in *Escherichia coli*. *Arch Microbiol*.  
747 1992;158(6):444-451. doi:10.1007/BF00276307
- 748 60. Mast Y, Weber T, Gözl M, et al. Characterization of the “pristinamycin supercluster” of  
749 *Streptomyces pristinaespiralis* bt\_213 192..206. doi:10.1111/j.1751-7915.2010.00213.x
- 750 61. Folcher M, Morris RP, Dale G, Salah-Bey-Hocini K, Viollier PH, Thompson CJ. A Transcriptional  
751 Regulator of a Pristinamycin Resistance Gene in *Streptomyces coelicolor*\*. 2000.  
752 doi:10.1074/jbc.M007690200
- 753 62. Garneau S, Martin NI, Vederas JC. Two-peptide bacteriocins produced by lactic acid bacteria.

- 754 *Biochimie*. 2002;84(5-6):577-592. doi:10.1016/S0300-9084(02)01414-1
- 755 63. Sit CS, Yoganathan S, Vederas JC. Biosynthesis of Aminovinyl-Cysteine-Containing Peptides  
756 and Its Application in the Production of Potential Drug Candidates. *Acc Chem Res*.  
757 2011;44(4):261-268. doi:10.1021/ar1001395
- 758 64. Clausen M, Lamb CJ, Megnet R, Doerner PW. PAD1 encodes phenylacrylic acid decarboxylase  
759 which confers resistance to cinnamic acid in *Saccharomyces cerevisiae*. *Gene*.  
760 1994;142(1):107-112. doi:10.1016/0378-1119(94)90363-8
- 761 65. Tang J, Lu J, Luo Q, Wang H. Discovery and biosynthesis of thioviridamide-like compounds.  
762 *Chinese Chem Lett*. 2018;29:1022-1028. doi:10.1016/j.ccl.2018.05.004
- 763 66. Burkhart BJ, Schwalen CJ, Mann G, Naismith JH, Mitchell DA. YcaO-Dependent  
764 Posttranslational Amide Activation: Biosynthesis, Structure, and Function. *Chem Rev*.  
765 2017;117(8):5389-5456. doi:10.1021/acs.chemrev.6b00623
- 766 67. Vara J, Lewandowska-Skarbek M, Wang YG, Donadio S, Hutchinson CR. Cloning of genes  
767 governing the deoxysugar portion of the erythromycin biosynthesis pathway in  
768 *Saccharopolyspora erythraea* (*Streptomyces erythreus*). *J Bacteriol*. 1989;171:5872-5881.
- 769 68. Bierman M, Logan R, O'Brien K, Seno ET, Rao RN, Schoner BE. Plasmid cloning vectors for the  
770 conjugal transfer of DNA from *Escherichia coli* to *Streptomyces* spp. *Gene*. 1992;116:43-49.  
771 doi:10.1016/0378-1119(92)90627-2
- 772 69. Fedoryshyn M, Welle E, Bechthold A, Luzhetskyy A. Functional expression of the Cre  
773 recombinase in actinomycetes. *Appl Microbiol Biotechnol*. 2008;78(6):1065-1070.  
774 doi:10.1007/s00253-008-1382-9
- 775 70. Larson JL, Hershberger CL. The minimal replicon of a streptomycete plasmid produces an  
776 ultrahigh level of plasmid DNA. *Plasmid*. 1986;15:199-209. doi:10.1016/0147-619X(86)90038-  
777 7
- 778 71. Yang X, Van Der Donk WA. Post-translational Introduction of D-Alanine into Ribosomally  
779 Synthesized Peptides by the Dehydroalanine Reductase NpnJ. 2015. doi:10.1021/jacs.5b05207
- 780 72. Cox CL, Tietz JI, Sokolowski K, Melby JO, Doroghazi JR, Mitchell DA. Nucleophilic 1,4-additions  
781 for natural product discovery. *ACS Chem Biol*. 2014;9(9):2014-2022. doi:10.1021/cb500324n
- 782 73. Zhao X, Van Der Donk WA. Structural Characterization and Bioactivity Analysis of the Two-  
783 Component Lantibiotic Flv System from a Ruminant Bacterium. *Cell Chem Biol*.  
784 2016;23(2):246-256. doi:10.1016/j.chembiol.2015.11.014
- 785 74. Ross AC, Liu H, Pattabiraman VR, Vederas JC. Synthesis of the lantibiotic lactocin S using  
786 peptide cyclizations on solid phase. *J Am Chem Soc*. 2010;132(2):462-463.  
787 doi:10.1021/ja9095945
- 788 75. Frattaruolo L, Lacroix R, Cappello AR, Truman AW. A Genomics-Based Approach Identifies a  
789 Thioviridamide-Like Compound with Selective Anticancer Activity. 2017.  
790 doi:10.1021/acscchembio.7b00677
- 791 76. Navarro-Muñoz JC, Selem-Mojica N, Mullaney MW, et al. A computational framework for  
792 systematic exploration of biosynthetic diversity from large-scale genomic data. *bioRxiv*.  
793 October 2018:445270. doi:10.1101/445270

794 77. Cotter PD, O'Connor PM, Draper LA, et al. Posttranslational conversion of L-serines to D-  
795 alanines is vital for optimal production and activity of the lantibiotic lactacin 3147. *Proc Natl*  
796 *Acad Sci U S A*. 2005;102(51):18584-18589. doi:10.1073/pnas.0509371102

797
